# Supplementary material for: Heavy and Light Mineral Association of Late Quaternary Permafrost Deposits in Northeastern Siberia
Source: Frontiers journal article supplement (doi:10.3389/feart.2022.741932), 2022-03-09
Supplement: Data_Sheet_2.xlsx [file Data_Sheet_2.xlsx]

## Sheet: Bolshoy Lyakhovsky (1)
heavy minerals 63-125 µm																															light minerals 63-125 µm
unit	ilmenite	epidote	pyroxene monocline	pyroxene rhombic	amphibole	garnet	zircone	apatite	tourmaline	sphene	rutile	anatase	leucoxene	biotite	chlorite	weathered mica	disthene	staurolite	andalusite	chloritoide	spodumene	corundite	ortithe	sillimanite	chromite	spinelle	pyrite	muscovite	heavy mineral fraction (wt %)		quartz	feldspar	zeolithe	carbonate	muscowite	biotite	chlorite	broken mica	debris+aggregates
MIS1	4.37536	13.2378	4.2863	0.741318	47.8268	1.42776	0.408909	1.41121	0.608909	2.14245	0.0375	0	3.45838	0.075	4.86677	14.5375	0.0375	0	0	0	0	0	0	0	0	0	0	0	1.4875		11.4833	42.5	0	0.15	1.21667	0.166667	2.8	2.81667	38.6
MIS2	3.975	25.75	2.7	2.225	28.475	2.9	1.875	0.6	0.325	1.025	0.275	0	13.775	3.05	0.15	12.225	0.15	0	0.15	0.075	0	0	0.3	0	0	0	0	0	0.416667		12.6	34.4	0	1.43333	1.03333	0.966667	0.1	10.7667	38.7
MIS3	2.89155	18.0064	7.89475	0.185714	39.8379	2.06006	0.674344	1.4172	0.38863	3.87012	0.1	0.271429	3.76327	0.65	5.10292	12.8857	0	0	0	0	0	0	0	0	0	0	0	0	0.280769		5.75556	43.9889	0	0.366667	0.622222	0	0.633333	1.45556	47.1778
MIS4	2.025	10.5625	8.0625	0.35	30.4875	1.975	0.15	1.2375	0.15	3.075	0.1875	0.0375	1.7375	4.0625	3.1375	32.4	0	0	0	0	0	0	0.075	0	0	0	0.25	0	0.39		2.475	69.6	0.05	0.65	1	0	2.475	6.425	17.325
MIS5a-d	1.75385	8.19231	4.05385	0.346154	23.7692	1.3	0.338462	0.753846	0.3	2.46923	0.123077	0.0692308	2.00769	6.66923	6.63846	41.1308	0	0	0	0	0	0	0.0230769	0	0	0	0	0	0.909091		7.03333	54.4167	0.133333	0.716667	1.61667	0	2.53333	15.3167	18.2333
MIS5e	2.03636	16.6909	5.71818	1.56364	27.1364	2.66364	0.536364	1.21818	0.472727	2.65455	0.118182	0.118182	2.92727	2.56364	8.06364	25.4455	0	0	0	0	0	0	0.0727273	0	0	0	0	0	0.284		8.3	62.4	0	0.2	1	0	10.1	5.2	12.8
MIS6	10.2706	17.2941	4.67647	2.05294	28.5647	5.22353	1.98824	1.59412	0.829412	4.27059	0.629412	0.135294	12.3529	3.43529	3.97059	2.38824	0.0352941	0	0.0176471	0.0705882	0.0352941	0	0.129412	0	0	0	0.0352941	0	0.908824		12.1875	55.2875	0	0.075	2.15	1.7875	1.425	5	22.0875
MIS7	10.7143	16.3643	5.06714	1.87857	29.9643	6.31429	1.76429	2.38571	1.1	3.89286	0.228571	0.221429	18.8643	0.292857	0.278571	0.342857	0.0214286	0.0642857	0.15	0.0357143	0	0	0.0357143	0	0	0	0	0	0.620714		12.1875	55.9	0	0	0.2375	0.227693	1.1375	0.4375	29.875
heavy minerals 125-250 µm																															light minerals 125-250 µm
MIS1	5.78518	11.4712	5.46954	1.22541	52.2395	1.85	1.025	0.775	0.684354	3.26606	0.075	0	3.69106	0.309354	4.02036	7.98162	0.075	0.075	0	0	0	0	0	0	0	0	0	0	2.075		6.16667	40.9	0	0.333333	0.1	0.3	0.766667	2.83333	48.6333
MIS2
MIS3	3.325	18.275	8.1	0.7	37.425	2.95	0.425	0.35	0.975	4.95	0.2	0	3.375	5.15	3.275	10.45	0	0	0	0	0	0	0	0	0	0	0	0	0.2375		0.3	1	0	2.5	0.45	0	0	0	95.75
MIS4	4.16661	12.8329	10.3997	0.866667	34.2654	1.4333	0.836666	1.66664	0.699983	3.79981	1.23333	0	3.56651	7.43265	4.76654	11.9333	0	0	0	0	0	0	0.1	0	0	0	0	0	0.213333		4.36667	53.3	0	0	3.26667	0	3.26667	16.3667	19.4333
MIS5a-d	4.83333	11.9	5.46667	0.633333	29.0333	2.46667	0.4	1.6	0.1	3.66667	0	0.5	1.4	8.4	5.1	24.5	0	0	0	0	0	0	0	0	0	0	0	0	0.266667		5.15	30.4	0	0.2	1.925	1.7	1.65	8.425	50.55
MIS5e	3.46667	15.4558	3.72109	0	41.3027	3.86667	0.733333	4.60748	1.92721	2.49388	0.680272	3.40136	3.86667	0	7.36803	6.57551	0.266667	0	0	0	0	0	0	0	0	0	0	0	3.58333		0	0	0	0	0	0	0	0	0
MIS6	21.9089	11.871	4.43456	0.861731	20.3134	4.25737	1.11603	1.60092	0.962118	2.27887	0.585001	0.1	17.4447	7.45869	3.39827	0.915601	0.0462465	0	0.161538	0	0	0	0.0693234	0	0	0	0	0.215817	0.538462		12.4333	51.3333	0	0.0666667	0.883333	0.616667	1	1.3	32.3667
MIS7	21.6419	17.0446	2.07081	3.84444	23.0403	6.84	0.961333	1.41605	2.36169	1.05556	0.266667	0.111111	18.3289	0	0	0.194932	0.2	0	0.477778	0	0	0.110668	0.0333333	0	0	0	0	0	0.694444		12.0333	51.3167	0	0	0.116667	0.1	0	8.75	27.6833

## Sheet: Oyogos Yar (2)
heavy minerals 63-125 µm
unit	ilmenite	epidote	pyroxene monocline	pyroxene rhombic	amphibole	garnet	zircone	apatite	tourmaline	sphene	rutile	anatase	leucoxene	disthene	staurolite	andalusite	chloritoide	spodumene	corundite	ortithe	sillimanite	chromite	spinelle	pyrite	biotite	chlorite	muscovite	weathered mica	heavy mineral fraction (wt %)
MIS3	2.5641	10.4588	24.4265	5.16194	31.2078	5.22942	0	5.19568	1.31579	3.91363	0	0	5.26316	0	0	0	0	0	0	0	0	1.31579	0	0	0	0	0	3.94737	0.025
MIS4	2.3	17.2	17.2	2.6	41.3	2.6	0.7	3	0	2	0	0	5.8	0	0	0	0	0	0	0	0	0	0	0	0	0	0	5.3	0.2
MIS5a-d	2.97814	19.832	15.072	2.43119	40.4006	5.30428	0.636502	3.23301	0.572212	4.34041	0.0765381	0.285299	4.05276	0	0.0257075	0	0	0	0	0.0257075	0	0	0	0	0.0837398	0.167215	0	0.497085	0.281667
MIS5e	2.54758	18.8866	16.6052	4.32505	38.3356	5.00618	0.415733	3.56979	0.745722	4.3527	0.05	0.09875	4.53576	0.152941	0	0	0	0	0	0	0	0	0	0	0.049375	0.147785	0	0.163451	0.318333

## Sheet: Svyatoy Nos (3)
heavy minerals 63-125 µm																															light minerals 63-125 µm
unit	ilmenite	epidote	pyroxene monocline	pyroxene rhombic	amphibole	garnet	zircone	apatite	tourmaline	sphene	rutile	anatase	leucoxene	disthene	staurolite	andalusite	chloritoide	spodumene	corundite	ortithe	sillimanite	chromite	spinelle	pyrite	biotite	chlorite	muscovite	weathered mica	heavy mineral fraction (wt %)		quartz	feldspar	zeolithe	carbonate	muscowite	biotite	chlorite	broken mica	debris+aggregates
MIS3	3.20192	8.99006	30.1446	0	35.5921	1.60561	0.0766827	0.851683	0.326683	1.41402	0	0	1.38061	0	0	0	0	0	0	0	0	0	0	0	0.255609	3.6	0	12.559	0.6		4.55	67.725	0	0.675	3.375	0	3.85	5.075	14.575
MIS 5a-d	5.10622	10.1793	6.05247	0	15.9347	0.853613	0.572391	0.241621	0.10101	3.0699	0.23569	0	0.639731	0	0	0.10101	0	0	0	0	0	0	0	0	52.6228	4.28114	0	0	0.483333		1.46667	43.6667	0	0.4	17	0	24.8333	8.43333	4.2
MIS 7	8.84286	4.5	16.0286	0.257143	64.3143	0.414286	0.7	0.157143	0	1.41429	0.0285714	0.0714286	0.742857	0	0	0.0428571	0	0	0	0	0	0	0	0	0.328571	0.928571	0	1.18571	8.51429		9.38333	75.45	0	0.383333	0.266667	0.0333333	6.81667	1.21667	6.45
heavy minerals 125-250 µm																															light minerals 125-250 µm
MIS3	4.19048	16.7714	32.6429	0.133333	25.4381	0.861905	0.133333	0	0.133333	0.266667	0	0	0.133333	0	0	0	0	0	0	0	0	0	0	0	14.4952	3.3	0	1.13333	0.433333		19.8	44	0	0.6	0	0	13.2	0	22.4
MIS 5a-d	3.06667	7.13333	8.46667	0.1	39.4667	1.1	0.466667	0.433333	0.466667	2.03333	0	0	1.83333	0	0	0.1	0	0	0	0	0	0	0	0	24.1	9.26667	0	1.86667	1.83333		19.8	44	0	0.6	0	0	13.2	0	22.4
MIS 7	6.8	3.4	15.25	0.433333	71.3333	0.366667	0.1	0	0	0.483333	0.05	0	0.266667	0	0	0	0	0	0	0	0	0	0	0	0.2	0.983333	0	0.316667	9.2		19.8	44	0	0.6	0	0	13.2	0	22.4

## Sheet: Stolbovoy Island (4)
heavy minerals 63-125 µm
unit	ilmenite	epidote	pyroxene monocline	pyroxene rhombic	amphibole	garnet	zircone	apatite	tourmaline	sphene	rutile	anatase	leucoxene	disthene	staurolite	andalusite	chloritoide	spodumene	corundite	ortithe	sillimanite	chromite	spinelle	pyrite	biotite	chlorite	muscovite	weathered mica	heavy mineral fraction (wt %)
MIS 1	2.2	15.7	6	1.9	38.7	4.7	0.9	1.3	0.3	3.1	0	0	2.8	0	0	0	0	0	0	0	0	0	0	0	1.9	17.6	2.8	0	5.2
MIS 3	2.68333	10.9333	3.55	0.25	14.4333	1.61667	0.516667	0.566667	0.05	2.33333	0.1	0.1	0.116667	0	0	0	0.05	0	0	0	0	0	0	0	3.23333	32.0667	27.3833	0	1.18333
MIS 4	1.46667	6.26667	3.3	0.211111	15.7556	0.866667	0.233333	0.4	0.0222222	1.31111	0.0333333	0.0333333	0.366667	0	0	0	0.0333333	0	0	0	0	0	0	0	13.7667	39.4111	16.4111	0	1.11111
heavy minerals 125-250 µm
MIS 1	4.8	0.3	0.6	0	1.5	0	0	0	0	0	0	0	0	0	0	0	0	0	0	0	0	0	0	0	29.3	39.6	23.3	0	7.8
MIS 3	0	0	0	0	0	0	0	0	0	0	0	0	0	0	0	0	0	0	0	0	0	0	0	0	10	47	43	0	0.1
MIS 4	0	0	0	0	0	0	0	0	0	0	0	0	0	0	0	0	0	0	0	0	0	0	0	0	20.825	68.3125	10.8625	0	7.34375

## Sheet: Bel'kovsky Island (5)
heavy minerals 63-125 µm
unit	ilmenite	epidote	pyroxene monocline	pyroxene rhombic	amphibole	garnet	zircone	apatite	tourmaline	sphene	rutile	anatase	leucoxene	disthene	staurolite	andalusite	chloritoide	spodumene	corundite	ortithe	sillimanite	chromite	spinelle	pyrite	biotite	chlorite	muscovite	weathered mica	heavy mineral fraction (wt %)
MIS 1	1.8	19.45	11.7	0.75	40.9	3	0.15	0.75	0.15	2.75	0	0	1.05	0	0	0	0	0	0	0	0	0	0	0	0	12.1	5.45	0	1.7
MIS 3	1.36667	11.3	7.76667	0.4	25.3667	2.8	0.1	0.3	0.1	1.6	0.1	0	0.533333	0.1	0	0	0	0	0	0	0	0	0	0	0.1	30.7667	17.3	0	0.45

## Sheet: Mys Anissi, Kotel'ny Island (6)
heavy minerals 63-125 µm
unit	ilmenite	epidote	pyroxene monocline	pyroxene rhombic	amphibole	garnet	zircone	apatite	tourmaline	sphene	rutile	anatase	leucoxene	disthene	staurolite	andalusite	chloritoide	spodumene	corundite	ortithe	sillimanite	chromite	spinelle	pyrite	biotite	chlorite	muscovite	weathered mica	heavy mineral fraction (wt %)
MIS 2	5.96667	13.6667	18.4	1.46667	38.3667	6	0.933333	1.76667	0.766667	6	0.2	0	0.9	0	0.233333	0	0	0	0	0.1	0.1	0	0	0	0.2	4.53333	0.4	0	0.533333
heavy minerals 125-250 µm
MIS 2	11.8	9.8	10.8	3.8	24.4	11.8	1	0	1	4.9	0	0	4.9	0	2	0	0	0	0	0	0	0	0	0	3.9	5.9	3.9	0	0.2

## Sheet: Bunge Land, high terrace (7a)
heavy minerals 63-125 µm
unit	ilmenite	epidote	pyroxene monocline	pyroxene rhombic	amphibole	garnet	zircone	apatite	tourmaline	sphene	rutile	anatase	leucoxene	disthene	staurolite	andalusite	chloritoide	spodumene	corundite	ortithe	sillimanite	chromite	spinelle	pyrite	biotite	chlorite	muscovite	weathered mica	heavy mineral fraction (wt %)
MIS 1	7.47273	20.8545	12.3	1.99091	33.7727	8.74545	1.60909	0.863636	0.745455	6.39091	0.327273	0	4.76364	0.0272727	0.0272727	0.0545455	0.0272727	0	0	0	0	0	0	0	0	0.0272727	0	0	1.67273
MIS 2	5.4	22.04	12.26	2.34	38.04	7.26	1.04	1.52	1.18	5.06	0.04	0	3.56	0	0	0	0	0	0	0	0.06	0	0	0	0	0.2	0	0	1.14
heavy minerals 125-250 µm
MIS 1	9.5375	21.9625	7.3125	1.325	23.5375	20.1625	0.3625	0.175	3.375	4.15	0.075	0	5.475	0.3875	0.2125	0.8125	0.05	0	0	0	0.1125	0	0	0	0	0.2625	0.725	0	0.6375
MIS 2	6.955	18.0667	7.935	1.86	22.26	8.2375	1.185	1.01333	2	4.14167	0.24	0.06	5.49	0.268333	0	0.12	0	0	0	0	0.06	0	0	0	2.77	1.845	16.305	0	0.3

## Sheet: Bunge Land, low terrace (7b)
heavy minerals 63-125 µm
unit	ilmenite	epidote	pyroxene monocline	pyroxene rhombic	amphibole	garnet	zircone	apatite	tourmaline	sphene	rutile	anatase	leucoxene	disthene	staurolite	andalusite	chloritoide	spodumene	corundite	ortithe	sillimanite	chromite	spinelle	pyrite	biotite	chlorite	muscovite	weathered mica	heavy mineral fraction (wt %)
MIS 1	6.24	18.88	14.36	2.08	30.38	14.5	1.26	0.3	1.08	4.36	0.12	0	5.06	0.18	0.24	0.18	0	0	0	0	0.06	0	0	1.36	0.06	0.12	0	0	4.14
heavy minerals 125-250 µm
MIS 1	3.66618	24.1078	9.43725	0.670588	20.5162	26.4127	0.375	0	3.45245	3.56029	0.075	0	5.74657	0.448529	0.15	0.744118	0	0	0	0	0.075	0	0	0	0	0.0735294	0.0735294	0	0.7

## Sheet: Novaya Sibir Island (8)
heavy minerals 63-125 µm
unit	ilmenite	epidote	pyroxene monocline	pyroxene rhombic	amphibole	garnet	zircone	apatite	tourmaline	sphene	rutile	anatase	leucoxene	disthene	staurolite	andalusite	chloritoide	spodumene	corundite	ortithe	sillimanite	chromite	spinelle	pyrite	biotite	chlorite	muscovite	weathered mica	heavy mineral fraction (wt %)
MIS 1	18.7	5.8	6.4	3.5	11.4	33.9	5.6	0	0.9	7.3	1.2	0	4.4	0.9	0	0	0	0	0	0	0	0	0	0	0	0	0	0	16.9
MIS 4	10.5667	17.1	11	2.36667	28.4	9.96667	2.4	2.13333	0.9	2.66667	0.1	0	3.93333	0	0	0.2	0	0	0	0	0	0	0	1.76667	1.06667	5.33333	0.1	0	3.535
MIS 5e	9.9	20.5	9.6	2	34.4	6.6	1.8	1.3	0.3	2.3	0.7	0	8.3	0	0	0	0	0	0	0	0	0	0	1.3	0.7	0.3	0	0	2.7
heavy minerals 125-250 µm
MIS 1
MIS 4	16.0667	16.7	7.6	5.16667	20.7	17.7333	1.16667	0.4	1.6	2.3	0.1	0	5.23333	0.366667	0.7	0.333333	0	0	0	0	0.133333	0	0	1.33333	1.76667	0.6	0	0	1.76667
MIS 5e	8.8	15.4	11.8	1.3	28.4	15	0	0.7	1.3	1.3	0	0	2.6	0.7	0.3	0	0	0	0	0	0	0	0	0.7	11.4	0.3	0	0	0.9

## Sheet: Bykovsky, Mamontovy Khayata (9)
heavy minerals 63-125 µm																															light minerals 63-125 µm
unit	ilmenite	epidote	pyroxene monocline	pyroxene rhombic	amphibole	garnet	zircone	apatite	tourmaline	sphene	rutile	anatase	leucoxene	disthene	staurolite	andalusite	chloritoide	spodumene	corundite	ortithe	sillimanite	chromite	spinelle	pyrite	biotite	chlorite	muscovite	weathered mica	heavy mineral fraction (wt %)		quartz	feldspar	zeolithe	carbonate	muscowite	biotite	chlorite	broken mica	debris+aggregates
MIS 1	16.3538	6.66923	45.8231	0.453846	13.4077	2.87692	1.75385	2.36154	0.430769	2.06923	0.1	0	6.97692	0.0769231	0.0153846	0	0.0230769	0	0	0	0.0230769	0	0	0	0.0692308	0.492308	0	0.0461538	1.92308		5.86154	31.4923	0	0.553846	0	0	0.161538	0.0461538	61.8846
MIS 2	15.1277	4.44243	51.1275	0.222222	10.5557	2.68596	1.17304	2.58305	0.437073	2.36445	0.266738	0.0111111	7.60069	0.0111111	0	0.0333688	0.0111111	0	0	0	0	0	0	0.0111111	0.081517	0.997752	0	0.270441	0.896296		4.19	26.68	0	2.63	0.02	0	0.2	0.01	66.26
MIS 3	13.2352	6.4523	45.181	0.228571	14.3449	3.07143	1.34131	2.94651	0.852381	2.92343	0.186445	0	7.26796	0.171429	0.0238095	0	0.1	0	0	0.052381	0.0142857	0	0	0	0.0952381	0.781683	0	0.72381	1.175		5.36124	29.1246	0	1.12849	0.0523579	0	0.371314	0	63.9505
heavy minerals 125-250 µm																															light minerals 125-250 µm
MIS 1	13.5966	5.4405	64.2023	0.383475	5.27631	3.65573	0.292308	0.591167	0.330769	0.489655	0	0	3.94538	0.169231	0.0230769	0.0245889	0	0	0	0	0.0307692	0	0	0	0.101512	1.38196	0	0.0769231	1.16923		3.64752	32.8926	0	0.361538	0.0461538	0	0.207692	6.17692	56.5349
MIS 2	12.849	2.62913	69.2904	0.326667	5.19159	2.5958	0.226667	0.663333	0.293333	0.48	0.02	0.0724638	4.0658	0.133333	0.03	0.0166667	0.0233333	0	0	0	0.02	0	0	0	0.0366667	0.81	0	0.132464	0.544444		1.64333	26.8267	0	0.47	0.0833333	0	0.04	0.01	70.97
MIS 3	9.29955	5.27258	61.8274	0.135	8.36151	2.38588	0.44	0.975	0.49	1.47994	0.0999351	0	5.40942	0.135	0.025	0	0	0	0	0.03	0.065	0	0	0	0.402974	1.16974	0	1.99108	0.3925		1.77143	26.9905	0	0.157143	0.104762	0.0142857	0.0904762	0.00952381	70.8667

[truncated: 9 more sheets: Bykovsky North (10), Ivashkina Lagoon (11), Khorogor Valley (12), eastern Ebe Basyn Isl (13), Turakh Island (14), Nagym, Ebe Basyn Island (15), Khardang Island (16), Kurungnakh Island (17), Cape Mamontov Klyk (18)]
